# Supplementary material
Source: HighWire-hosted journal article supplement (http://www.ajnr.org/highwire/filestream/77932/field_highwire_adjunct_files/0/20-00777.pdf)
Supplement: 20-00777.pdf [file 20-00777.pdf]

## ON-LINE APPENDIX

### MT REFERRAL COVID-19 CHECKLIST

Swab taken:            YES            NO

Date: \_\_\_\_\_

---

Patient to wear fluid-repellent mask in all suspected and confirmed cases

---

Does the patient have

- Severe acute respiratory infection requiring hospital admission

YES            NO

- Clinical evidence of pneumonia

YES            NO

OR

- Shortness of breath/Increased respiratory rate

YES            NO

- Cough

YES            NO

- Fever

YES            NO

- Hyposmia/Loss of taste

YES            NO

OR

- Immunocompromise with an atypical presentation

YES            NO

OR

- New lymphopenia (lymphocyte count of <1)

YES            NO

OR

- CT chest or chest x-ray findings (COVID/Infection related)

YES            NO

If YES to any of the above then (considered as high risk for COVID):

1. Inform infection control of transfer
2. Inform bed managers to identify an appropriate space
3. Inform theater and interventional neuroradiology coordinators
4. PPE as per Nottingham University Hospitals guidelines
5. Transfer directly into the angiography theater
6. PPE, filtering facepiece class 2 or 3 mask, visor for aerosol-generating procedures
